# Supplementary material for: A diagnostic accuracy study validating cardiovascular ICD-9-CM codes in healthcare administrative databases. The Umbria Data-Value Project
Source: PubMed Central journal article supplement (PMC6613689; doi:10.1371/journal.pone.0218919), 2019-07-08
Supplement: pone.0218919.s002.pdf [file pone.0218919.s002.pdf]

## Myocardial Infarction

| Number Clinical Chart | Hospital   | Gender | Admission date | Discharge date | Patient's age on admission | Primary Diagnosis (ICD-9) | Symptoms Myocardial Infarction | High Troponin | ECG abnormal | Echocardiogram abnormal | Arteriography abnormal | Validation |
|-----------------------|------------|--------|----------------|----------------|----------------------------|---------------------------|--------------------------------|---------------|--------------|-------------------------|------------------------|------------|
| Chart_1               | Hospital_1 | M      | Jan-12         | Jan-12         | 76                         | 41011                     | 1                              | 1             | 1            | 1                       | 1                      | 1          |
| Chart_2               | Hospital_1 | F      | Jan-12         | Feb-12         | 58                         | 41011                     | 1                              | 1             | 1            | 1                       | 1                      | 1          |
| Chart_3               | Hospital_1 | M      | Jan-12         | Feb-12         | 77                         | 41071                     | 2                              | 1             | 1            | 1                       | 1                      | 1          |
| Chart_4               | Hospital_1 | M      | Feb-12         | Feb-12         | 69                         | 41071                     | 1                              | 1             | 1            | 0                       | 2                      | 1          |
| Chart_5               | Hospital_1 | M      | Feb-12         | Feb-12         | 87                         | 41041                     | 1                              | 1             | 1            | 1                       | 1                      | 1          |
| Chart_6               | Hospital_1 | M      | Mar-12         | Mar-12         | 67                         | 41041                     | 1                              | 1             | 1            | 1                       | 1                      | 1          |
| Chart_7               | Hospital_1 | M      | Mar-12         | Apr-12         | 53                         | 41071                     | 1                              | 1             | 1            | 1                       | 1                      | 1          |
| Chart_8               | Hospital_1 | M      | Apr-12         | Apr-12         | 70                         | 41041                     | 1                              | 1             | 1            | 1                       | 1                      | 1          |
| Chart_9               | Hospital_1 | M      | Apr-12         | Apr-12         | 48                         | 41011                     | 1                              | 1             | 1            | 1                       | 1                      | 1          |
| Chart_10              | Hospital_1 | M      | Apr-12         | May-12         | 65                         | 41011                     | 1                              | 1             | 1            | 1                       | 2                      | 1          |
| Chart_11              | Hospital_1 | F      | May-12         | May-12         | 68                         | 41071                     | 1                              | 1             | 0            | 0                       | 1                      | 1          |
| Chart_12              | Hospital_1 | M      | May-12         | May-12         | 53                         | 41011                     | 1                              | 1             | 1            | 1                       | 2                      | 1          |
| Chart_13              | Hospital_1 | F      | Jun-12         | Jun-12         | 77                         | 41011                     | 1                              | 1             | 1            | 1                       | 1                      | 1          |
| Chart_14              | Hospital_1 | M      | Jun-12         | Jun-12         | 51                         | 41041                     | 1                              | 1             | 1            | 1                       | 2                      | 1          |
| Chart_15              | Hospital_1 | M      | Jul-12         | Jul-12         | 48                         | 41041                     | 1                              | 1             | 1            | 1                       | 1                      | 1          |
| Chart_16              | Hospital_1 | M      | Aug-12         | Aug-12         | 62                         | 41071                     | 1                              | 1             | 0            | 0                       | 1                      | 1          |
| Chart_17              | Hospital_1 | M      | Oct-12         | Oct-12         | 84                         | 41071                     | 1                              | 1             | 0            | 0                       | 1                      | 1          |
| Chart_18              | Hospital_1 | M      | Oct-12         | Oct-12         | 76                         | 41091                     | 1                              | 1             | 0            | 0                       | 2                      | 1          |
| Chart_19              | Hospital_1 | F      | Nov-12         | Nov-12         | 89                         | 41091                     | 2                              | 2             | 0            | 2                       | 2                      | 0          |
| Chart_20              | Hospital_1 | M      | Jan-13         | Jan-13         | 67                         | 41011                     | 1                              | 1             | 1            | 0                       | 2                      | 1          |
| Chart_21              | Hospital_1 | M      | Jan-13         | Jan-13         | 50                         | 41011                     | 1                              | 2             | 1            | 2                       | 1                      | 0          |
| Chart_22              | Hospital_1 | F      | Jan-13         | Feb-13         | 73                         | 41041                     | 1                              | 1             | 1            | 1                       | 1                      | 1          |
| Chart_23              | Hospital_1 | M      | Feb-13         | Feb-13         | 84                         | 41071                     | 0                              | 1             | 1            | 1                       | 1                      | 1          |
| Chart_24              | Hospital_1 | F      | Feb-13         | Feb-13         | 66                         | 41041                     | 1                              | 1             | 1            | 1                       | 1                      | 1          |
| Chart_25              | Hospital_1 | F      | Apr-13         | Apr-13         | 76                         | 41041                     | 1                              | 1             | 1            | 1                       | 1                      | 1          |
| Chart_26              | Hospital_1 | M      | Apr-13         | May-13         | 69                         | 41071                     | 1                              | 1             | 1            | 1                       | 1                      | 1          |
| Chart_27              | Hospital_1 | F      | May-13         | May-13         | 64                         | 41071                     | 1                              | 1             | 1            | 1                       | 1                      | 1          |
| Chart_28              | Hospital_1 | F      | May-13         | Jun-13         | 74                         | 41011                     | 1                              | 1             | 1            | 1                       | 2                      | 1          |
| Chart_29              | Hospital_1 | M      | Jun-13         | Jun-13         | 65                         | 41041                     | 1                              | 1             | 1            | 1                       | 1                      | 1          |
| Chart_30              | Hospital_1 | M      | Jul-13         | Jul-13         | 72                         | 41041                     | 1                              | 0             | 1            | 1                       | 1                      | 0          |
| Chart_31              | Hospital_1 | M      | Sep-13         | Oct-13         | 72                         | 41001                     | 1                              | 1             | 1            | 1                       | 2                      | 1          |
| Chart_32              | Hospital_1 | M      | Oct-13         | Nov-13         | 70                         | 41041                     | 1                              | 1             | 1            | 1                       | 2                      | 1          |
| Chart_33              | Hospital_1 | F      | Oct-13         | Nov-13         | 57                         | 41041                     | 1                              | 1             | 1            | 1                       | 1                      | 1          |

| Number<br>Clinical<br>Chart | Hospital   | Gender | Admission<br>date | Discharge<br>date | Patient's age<br>on admission | Primary<br>Diagnosis<br>(ICD-9) | Symptoms                 | High     | ECG      | Echocardio       | Arteriography | Validation |
|-----------------------------|------------|--------|-------------------|-------------------|-------------------------------|---------------------------------|--------------------------|----------|----------|------------------|---------------|------------|
|                             |            |        |                   |                   |                               |                                 | Myocardial<br>Infarction | Troponin | abnormal | gram<br>abnormal | abnormal      |            |
| Chart_34                    | Hospital_1 | M      | Nov-13            | Nov-13            | 49                            | 41041                           | 1                        | 1        | 1        | 1                | 1             | 1          |
| Chart_35                    | Hospital_1 | M      | Nov-13            | Nov-13            | 49                            | 41011                           | 1                        | 1        | 1        | 1                | 1             | 1          |
| Chart_36                    | Hospital_1 | F      | Dec-13            | Dec-13            | 51                            | 41051                           | 1                        | 1        | 1        | 0                | 1             | 1          |
| Chart_37                    | Hospital_1 | M      | Dec-13            | Dec-13            | 88                            | 41071                           | 1                        | 1        | 1        | 1                | 2             | 1          |
| Chart_38                    | Hospital_1 | M      | Dec-13            | Dec-13            | 104                           | 41071                           | 1                        | 1        | 0        | 1                | 2             | 1          |
| Chart_39                    | Hospital_1 | F      | Jan-14            | Jan-14            | 56                            | 41041                           | 1                        | 1        | 1        | 0                | 1             | 1          |
| Chart_40                    | Hospital_1 | M      | Feb-14            | Feb-14            | 53                            | 41071                           | 1                        | 1        | 1        | 0                | 1             | 1          |
| Chart_41                    | Hospital_1 | F      | Mar-14            | Mar-14            | 82                            | 41011                           | 1                        | 1        | 1        | 1                | 1             | 1          |
| Chart_42                    | Hospital_1 | M      | Mar-14            | Mar-14            | 70                            | 41071                           | 1                        | 1        | 1        | 0                | 1             | 1          |
| Chart_43                    | Hospital_1 | M      | Mar-14            | Apr-14            | 82                            | 41071                           | 1                        | 1        | 1        | 1                | 1             | 1          |
| Chart_44                    | Hospital_1 | F      | Apr-14            | May-14            | 67                            | 41011                           | 1                        | 1        | 1        | 1                | 1             | 1          |
| Chart_45                    | Hospital_1 | M      | Apr-14            | Apr-14            | 48                            | 41011                           | 1                        | 1        | 1        | 1                | 1             | 1          |
| Chart_46                    | Hospital_1 | M      | May-14            | Jun-14            | 87                            | 41071                           | 1                        | 1        | 1        | 0                | 1             | 1          |
| Chart_47                    | Hospital_1 | M      | Aug-14            | Aug-14            | 50                            | 41031                           | 1                        | 1        | 1        | 1                | 1             | 1          |
| Chart_48                    | Hospital_1 | M      | Oct-14            | Nov-14            | 74                            | 41011                           | 1                        | 1        | 1        | 1                | 1             | 1          |
| Chart_49                    | Hospital_1 | F      | Oct-14            | Oct-14            | 70                            | 41011                           | 0                        | 0        | 1        | 1                | 1             | 0          |
| Chart_50                    | Hospital_1 | F      | Dec-14            | Dec-14            | 61                            | 41011                           | 1                        | 1        | 1        | 0                | 1             | 1          |
| Chart_51                    | Hospital_1 | M      | Dec-14            | Dec-14            | 65                            | 41041                           | 1                        | 1        | 1        | 1                | 1             | 1          |
| Chart_52                    | Hospital_2 | F      | Jan-12            | Jan-12            | 71                            | 41021                           | 1                        | 1        | 1        | 1                | 1             | 1          |
| Chart_53                    | Hospital_2 | F      | Mar-12            | Mar-12            | 64                            | 41021                           | 1                        | 1        | 1        | 1                | 1             | 1          |
| Chart_54                    | Hospital_2 | M      | Mar-12            | Mar-12            | 74                            | 41011                           | 1                        | 1        | 1        | 0                | 2             | 1          |
| Chart_55                    | Hospital_2 | M      | Aug-12            | Aug-12            | 87                            | 41071                           | 1                        | 1        | 1        | 0                | 1             | 1          |
| Chart_56                    | Hospital_2 | M      | Sep-12            | Sep-12            | 62                            | 41021                           | 1                        | 1        | 1        | 0                | 0             | 1          |
| Chart_57                    | Hospital_2 | M      | Sep-12            | Sep-12            | 75                            | 41021                           | 0                        | 0        | 2        | 1                | 1             | 0          |
| Chart_58                    | Hospital_2 | M      | Sep-12            | Sep-12            | 74                            | 41011                           | 1                        | 1        | 1        | 0                | 1             | 1          |
| Chart_59                    | Hospital_2 | M      | Oct-12            | Oct-12            | 64                            | 41011                           | 1                        | 1        | 1        | 1                | 1             | 1          |
| Chart_60                    | Hospital_2 | M      | Nov-12            | Nov-12            | 84                            | 41091                           | 1                        | 1        | 1        | 1                | 1             | 1          |
| Chart_61                    | Hospital_2 | F      | May-13            | May-13            | 92                            | 41071                           | 1                        | 1        | 1        | 0                | 1             | 1          |
| Chart_62                    | Hospital_2 | M      | May-13            | May-13            | 78                            | 41011                           | 1                        | 1        | 1        | 1                | 1             | 1          |
| Chart_63                    | Hospital_2 | M      | Jul-13            | Jul-13            | 69                            | 41011                           | 1                        | 1        | 1        | 1                | 1             | 1          |
| Chart_64                    | Hospital_2 | F      | Jul-13            | Jul-13            | 83                            | 41091                           | 1                        | 1        | 1        | 1                | 1             | 1          |
| Chart_65                    | Hospital_2 | M      | Jul-13            | Jul-13            | 89                            | 41011                           | 1                        | 1        | 1        | 1                | 2             | 1          |
| Chart_66                    | Hospital_2 | M      | Aug-13            | Aug-13            | 56                            | 41011                           | 1                        | 1        | 0        | 0                | 1             | 1          |
| Chart_67                    | Hospital_2 | F      | Oct-13            | Oct-13            | 57                            | 41011                           | 1                        | 1        | 1        | 1                | 1             | 1          |
| Chart_68                    | Hospital_2 | M      | Oct-13            | Oct-13            | 83                            | 41011                           | 1                        | 1        | 1        | 1                | 2             | 1          |

| Number<br>Clinical<br>Chart | Hospital   | Gender | Admission<br>date | Discharge<br>date | Patient's age<br>on admission | Primary<br>Diagnosis<br>(ICD-9) | Symptoms                 | High     | ECG      | Echocardio       | Arteriography | Validation |
|-----------------------------|------------|--------|-------------------|-------------------|-------------------------------|---------------------------------|--------------------------|----------|----------|------------------|---------------|------------|
|                             |            |        |                   |                   |                               |                                 | Myocardial<br>Infarction | Troponin | abnormal | gram<br>abnormal | abnormal      |            |
| Chart_69                    | Hospital_2 | F      | Oct-13            | Oct-13            | 89                            | 41071                           | 1                        | 1        | 1        | 1                | 2             | 1          |
| Chart_70                    | Hospital_2 | M      | Oct-13            | Nov-13            | --                            | 41071                           | n.a.                     | n.a.     | n.a.     | n.a.             | n.a.          | n.a.       |
| Chart_71                    | Hospital_2 | M      | Dec-13            | Dec-13            | 77                            | 41021                           | 1                        | 1        | 1        | 1                | 1             | 1          |
| Chart_72                    | Hospital_2 | F      | Jan-14            | Feb-14            | 89                            | 41000                           | 1                        | 1        | 0        | 0                | 2             | 1          |
| Chart_73                    | Hospital_2 | M      | Jan-14            | Feb-14            | 80                            | 41071                           | 1                        | 1        | 1        | 0                | 1             | 1          |
| Chart_74                    | Hospital_2 | M      | May-14            | May-14            | 45                            | 41021                           | 1                        | 1        | 1        | 1                | 1             | 1          |
| Chart_75                    | Hospital_2 | F      | Jun-14            | Jun-14            | 81                            | 41072                           | 1                        | 1        | 1        | 1                | 2             | 1          |
| Chart_76                    | Hospital_2 | F      | Jul-14            | Jul-14            | 74                            | 41071                           | 1                        | 1        | 0        | 0                | 1             | 1          |
| Chart_77                    | Hospital_2 | M      | Sep-14            | Sep-14            | 38                            | 41011                           | 1                        | 1        | 1        | 1                | 1             | 1          |
| Chart_78                    | Hospital_2 | M      | Nov-14            | Nov-14            | 93                            | 41041                           | 1                        | 1        | 1        | 1                | 2             | 1          |
| Chart_79                    | Hospital_2 | M      | Nov-14            | Nov-14            | 47                            | 41011                           | 1                        | 1        | 1        | 1                | 1             | 1          |
| Chart_80                    | Hospital_2 | M      | Nov-14            | Nov-14            | 72                            | 41071                           | 1                        | 1        | 1        | 1                | 1             | 1          |
| Chart_81                    | Hospital_2 | M      | Nov-14            | Dec-14            | --                            | 41071                           | n.a.                     | n.a.     | n.a.     | n.a.             | n.a.          | n.a.       |
| Chart_82                    | Hospital_2 | M      | Dec-14            | Dec-14            | 78                            | 41071                           | 1                        | 1        | 1        | 0                | 1             | 1          |
| Chart_83                    | Hospital_3 | M      | Jan-12            | Jan-12            | 92                            | 41041                           | 2                        | 1        | 1        | 0                | 2             | 1          |
| Chart_84                    | Hospital_3 | F      | Apr-12            | May-12            | 77                            | 41071                           | 1                        | 1        | 0        | 0                | 1             | 1          |
| Chart_85                    | Hospital_3 | M      | Jan-13            | Jan-13            | 76                            | 41071                           | 1                        | 2        | 0        | 0                | 1             | 0          |
| Chart_86                    | Hospital_3 | F      | Mar-13            | Mar-13            | 92                            | 41001                           | 1                        | 1        | 1        | 1                | 2             | 1          |
| Chart_87                    | Hospital_3 | M      | Jun-13            | Jun-13            | 81                            | 41071                           | 1                        | 1        | 0        | 0                | 2             | 1          |
| Chart_88                    | Hospital_3 | M      | Jun-13            | Jun-13            | 74                            | 41071                           | 1                        | 1        | 1        | 0                | 2             | 1          |
| Chart_89                    | Hospital_3 | F      | Nov-13            | Nov-13            | 84                            | 41071                           | 0                        | 1        | 1        | 1                | 2             | 1          |
| Chart_90                    | Hospital_3 | F      | Feb-14            | Feb-14            | 90                            | 41071                           | 1                        | 1        | 1        | 1                | 2             | 1          |
| Chart_91                    | Hospital_3 | F      | May-14            | May-14            | 88                            | 41090                           | 1                        | 1        | 0        | 0                | 2             | 1          |
| Chart_92                    | Hospital_4 | M      | Apr-13            | May-13            | 55                            | 41071                           | 1                        | 1        | 1        | 0                | 1             | 1          |
| Chart_93                    | Hospital_4 | M      | Sep-12            | Sep-12            | 80                            | 41011                           | 1                        | 1        | 1        | 1                | 2             | 1          |
| Chart_94                    | Hospital_4 | M      | Oct-13            | Nov-13            | 75                            | 41091                           | 1                        | 1        | 2        | 1                | 1             | 1          |
| Chart_95                    | Hospital_4 | F      | May-13            | Jul-13            | 87                            | 41091                           | 1                        | 1        | 1        | 0                | 2             | 1          |
| Chart_96                    | Hospital_4 | M      | Mar-13            | Mar-13            | 66                            | 41041                           | 1                        | 1        | 1        | 1                | 1             | 1          |
| Chart_97                    | Hospital_4 | F      | Mar-13            | Mar-13            | 74                            | 41011                           | 1                        | 1        | 1        | 1                | 2             | 1          |
| Chart_98                    | Hospital_4 | M      | Apr-12            | Apr-12            | 52                            | 41071                           | 1                        | 1        | 0        | 0                | 2             | 1          |
| Chart_99                    | Hospital_4 | F      | Jul-14            | Jul-14            | 87                            | 41091                           | 1                        | 2        | 1        | 1                | 2             | 0          |
| Chart_100                   | Hospital_4 | M      | Mar-12            | Mar-12            | 77                            | 41071                           | 1                        | 1        | 1        | 0                | 2             | 1          |
| Chart_101                   | Hospital_5 | F      | Jan-12            | Jan-12            | 76                            | 41071                           | 1                        | 1        | 1        | 0                | 1             | 1          |
| Chart_102                   | Hospital_5 | M      | Apr-12            | Apr-12            | 55                            | 41071                           | 1                        | 1        | 1        | 1                | 1             | 1          |
| Chart_103                   | Hospital_5 | M      | Apr-12            | May-12            | 72                            | 41072                           | 1                        | 1        | 1        | 0                | 1             | 1          |

| Number<br>Clinical<br>Chart | Hospital   | Gender | Admission<br>date | Discharge<br>date | Patient's age<br>on admission | Primary<br>Diagnosis<br>(ICD-9) | Symptoms                 | High     | ECG      | Echocardio       | Arteriography | Validation |
|-----------------------------|------------|--------|-------------------|-------------------|-------------------------------|---------------------------------|--------------------------|----------|----------|------------------|---------------|------------|
|                             |            |        |                   |                   |                               |                                 | Myocardial<br>Infarction | Troponin | abnormal | gram<br>abnormal | abnormal      |            |
| Chart_104                   | Hospital_5 | M      | May-12            | May-12            | 74                            | 41071                           | 1                        | 1        | 0        | 1                | 1             | 1          |
| Chart_105                   | Hospital_5 | M      | Jun-12            | Jun-12            | 68                            | 41071                           | 1                        | 1        | 1        | 1                | 1             | 1          |
| Chart_106                   | Hospital_5 | M      | Oct-12            | Nov-12            | 76                            | 41011                           | 1                        | 1        | 1        | 1                | 1             | 1          |
| Chart_107                   | Hospital_5 | F      | Mar-13            | Mar-13            | 88                            | 41081                           | 1                        | 1        | 2        | 0                | 1             | 1          |
| Chart_108                   | Hospital_5 | M      | May-13            | Jun-13            | 64                            | 41041                           | 1                        | 1        | 1        | 1                | 1             | 1          |
| Chart_109                   | Hospital_5 | M      | Sep-13            | Sep-13            | 55                            | 41041                           | 1                        | 1        | 1        | 0                | 1             | 1          |
| Chart_110                   | Hospital_5 | M      | Dec-13            | Jan-14            | 78                            | 41021                           | 1                        | 1        | 1        | 1                | 1             | 1          |
| Chart_111                   | Hospital_5 | M      | Jan-14            | Jan-14            | 87                            | 41071                           | 1                        | 1        | 1        | 1                | 1             | 1          |
| Chart_112                   | Hospital_5 | F      | Mar-14            | Mar-14            | 85                            | 41041                           | 1                        | 1        | 1        | 1                | 2             | 1          |
| Chart_113                   | Hospital_5 | M      | May-14            | Jun-14            | 58                            | 41071                           | 1                        | 1        | 1        | 0                | 1             | 1          |
| Chart_114                   | Hospital_5 | M      | Jul-14            | Jul-14            | 59                            | 41041                           | 1                        | 1        | 1        | 1                | 1             | 1          |
| Chart_115                   | Hospital_5 | F      | Sep-14            | Sep-14            | 69                            | 41071                           | 1                        | 1        | 1        | 1                | 0             | 1          |
| Chart_116                   | Hospital_5 | M      | Nov-14            | Nov-14            | 59                            | 41011                           | 1                        | 1        | 1        | 1                | 1             | 1          |
| Chart_117                   | Hospital_5 | M      | Dec-14            | Dec-14            | 44                            | 41071                           | 1                        | 1        | 1        | 1                | 1             | 1          |
| Chart_118                   | Hospital_6 | M      | Jan-12            | Jan-12            | 73                            | 41021                           | 1                        | 1        | 1        | 1                | 2             | 1          |
| Chart_119                   | Hospital_6 | F      | Feb-12            | Mar-12            | 81                            | 41071                           | 1                        | 1        | 1        | 0                | 2             | 1          |
| Chart_120                   | Hospital_6 | M      | Nov-12            | Nov-12            | 84                            | 41071                           | 1                        | 1        | 0        | 1                | 2             | 1          |
| Chart_121                   | Hospital_6 | M      | Nov-12            | Dec-12            | 79                            | 41071                           | 1                        | 1        | 1        | 0                | 2             | 1          |
| Chart_122                   | Hospital_6 | F      | Dec-12            | Jan-13            | 97                            | 41071                           | 1                        | 1        | 1        | 0                | 2             | 1          |
| Chart_123                   | Hospital_6 | M      | Feb-14            | Mar-14            | 76                            | 41071                           | 1                        | 1        | 1        | 1                | 2             | 1          |
| Chart_124                   | Hospital_7 | M      | Jan-12            | Jan-12            | 74                            | 41071                           | 1                        | 1        | 1        | 1                | 2             | 1          |
| Chart_125                   | Hospital_7 | F      | May-12            | May-12            | 82                            | 41071                           | 1                        | 1        | 1        | 1                | 2             | 1          |
| Chart_126                   | Hospital_7 | F      | Aug-13            | Aug-13            | 66                            | 41071                           | 1                        | 1        | 0        | 1                | 2             | 1          |
| Chart_127                   | Hospital_7 | M      | Sep-13            | Sep-13            | 47                            | 41071                           | 1                        | 1        | 0        | 0                | 2             | 1          |
| Chart_128                   | Hospital_7 | M      | Oct-13            | Oct-13            | 80                            | 41071                           | 1                        | 1        | 0        | 0                | 2             | 1          |
| Chart_129                   | Hospital_7 | F      | Nov-13            | Nov-13            | 65                            | 41071                           | 1                        | 1        | 1        | 0                | 2             | 1          |
| Chart_130                   | Hospital_7 | F      | Dec-14            | Dec-14            | 80                            | 41071                           | 0                        | 1        | 1        | 1                | 2             | 1          |

Legend: 0=no; 1=yes; 2=not reported; n.a.=clinical chart not available

## Atrial fibrillation / flutter

| Number<br>Clinical Chart | Hospital   | Gender | Admission<br>date | Discharge<br>date | Patient's<br>age on<br>admission | Primary<br>Diagnosis<br>(ICD-9) | ECG abnormal<br>with presence<br>of AF/Flutter | Validation |
|--------------------------|------------|--------|-------------------|-------------------|----------------------------------|---------------------------------|------------------------------------------------|------------|
| chart_1                  | Hospital_1 | M      | Jan-12            | Jan-12            | 73                               | 42732                           | 1                                              | 1          |
| chart_2                  | Hospital_1 | M      | Feb-12            | Feb-12            | 61                               | 42732                           | 1                                              | 1          |
| chart_3                  | Hospital_1 | M      | Feb-12            | Feb-12            | 65                               | 42731                           | 1                                              | 1          |
| chart_4                  | Hospital_1 | F      | Mar-12            | Mar-12            | 83                               | 42731                           | 1                                              | 1          |
| chart_5                  | Hospital_1 | M      | Apr-12            | Apr-12            | 72                               | 42732                           | 1                                              | 1          |
| chart_6                  | Hospital_1 | M      | May-12            | May-12            | 49                               | 42731                           | 1                                              | 1          |
| chart_7                  | Hospital_1 | F      | May-12            | May-12            | 72                               | 42731                           | 1                                              | 1          |
| chart_8                  | Hospital_1 | M      | Jun-12            | Jun-12            | 77                               | 42731                           | 1                                              | 1          |
| chart_9                  | Hospital_1 | F      | Jun-12            | Jul-12            | 83                               | 42732                           | 1                                              | 1          |
| chart_10                 | Hospital_1 | M      | Jul-12            | Jul-12            | --                               | 42731                           | n.a.                                           | n.a.       |
| chart_11                 | Hospital_1 | F      | Aug-12            | Aug-12            | 79                               | 42732                           | 1                                              | 1          |
| chart_12                 | Hospital_1 | M      | Nov-12            | Nov-12            | 55                               | 42731                           | 1                                              | 1          |
| chart_13                 | Hospital_1 | M      | Jan-13            | Feb-13            | 86                               | 42731                           | 1                                              | 1          |
| chart_14                 | Hospital_1 | M      | Feb-13            | Feb-13            | 72                               | 42731                           | 1                                              | 1          |
| chart_15                 | Hospital_1 | F      | Apr-13            | Apr-13            | 53                               | 42731                           | 1                                              | 1          |
| chart_16                 | Hospital_1 | M      | May-13            | May-13            | 38                               | 42731                           | 1                                              | 1          |
| chart_17                 | Hospital_1 | F      | May-13            | May-13            | 52                               | 42731                           | 1                                              | 1          |
| chart_18                 | Hospital_1 | M      | Jun-13            | Jun-13            | 62                               | 42731                           | 1                                              | 1          |
| chart_19                 | Hospital_1 | F      | Jun-13            | Jul-13            | 83                               | 42731                           | 1                                              | 1          |
| chart_20                 | Hospital_1 | F      | Jul-13            | Jul-13            | 91                               | 42731                           | 1                                              | 1          |
| chart_21                 | Hospital_1 | M      | Jul-13            | Jul-13            | 54                               | 42731                           | 1                                              | 1          |
| chart_22                 | Hospital_1 | M      | Aug-13            | Aug-13            | 83                               | 42731                           | 1                                              | 1          |
| chart_23                 | Hospital_1 | M      | Sep-13            | Sep-13            | 47                               | 42731                           | 1                                              | 1          |
| chart_24                 | Hospital_1 | F      | Oct-13            | Oct-13            | 73                               | 42731                           | 1                                              | 1          |
| chart_25                 | Hospital_1 | M      | Nov-13            | Dec-13            | --                               | 42732                           | n.a.                                           | n.a.       |
| chart_26                 | Hospital_1 | F      | Dec-13            | Dec-13            | 66                               | 42731                           | 1                                              | 1          |
| chart_27                 | Hospital_1 | F      | Dec-13            | Dec-13            | 61                               | 42731                           | 1                                              | 1          |
| chart_28                 | Hospital_1 | F      | Dec-13            | Dec-13            | 89                               | 42731                           | 1                                              | 1          |
| chart_29                 | Hospital_1 | F      | Dec-13            | Dec-13            | 78                               | 42731                           | 1                                              | 1          |
| chart_30                 | Hospital_1 | F      | Jan-14            | Jan-14            | 80                               | 42731                           | 1                                              | 1          |
| chart_31                 | Hospital_1 | M      | Feb-14            | Feb-14            | 90                               | 42731                           | 1                                              | 1          |
| chart_32                 | Hospital_1 | F      | Feb-14            | Feb-14            | 83                               | 42731                           | 1                                              | 1          |

| Number<br>Clinical Chart | Hospital   | Gender | Admission<br>date | Discharge<br>date | Patient's<br>age on<br>admission | Primary<br>Diagnosis<br>(ICD-9) | ECG abnormal<br>with presence<br>of AF/Flutter | Validation |
|--------------------------|------------|--------|-------------------|-------------------|----------------------------------|---------------------------------|------------------------------------------------|------------|
| chart_33                 | Hospital_1 | F      | Feb-14            | Feb-14            | 64                               | 42732                           | 1                                              | 1          |
| chart_34                 | Hospital_1 | F      | Mar-14            | Mar-14            | 71                               | 42731                           | 1                                              | 1          |
| chart_35                 | Hospital_1 | M      | Mar-14            | Mar-14            | 80                               | 42731                           | 1                                              | 1          |
| chart_36                 | Hospital_1 | F      | May-14            | May-14            | 67                               | 42732                           | 0                                              | 0          |
| chart_37                 | Hospital_1 | M      | Jun-14            | Jun-14            | 76                               | 42732                           | 1                                              | 1          |
| chart_38                 | Hospital_1 | M      | Jun-14            | Jun-14            | 83                               | 42731                           | 1                                              | 1          |
| chart_39                 | Hospital_1 | M      | Jun-14            | Jul-14            | 92                               | 42731                           | 1                                              | 1          |
| chart_40                 | Hospital_1 | M      | Jul-14            | Jul-14            | 67                               | 42731                           | 1                                              | 1          |
| chart_41                 | Hospital_1 | F      | Oct-14            | Oct-14            | 93                               | 42731                           | 1                                              | 1          |
| chart_42                 | Hospital_1 | F      | Oct-14            | Oct-14            | 77                               | 42731                           | 1                                              | 1          |
| chart_43                 | Hospital_1 | M      | Nov-14            | Nov-14            | 84                               | 42732                           | 1                                              | 1          |
| chart_44                 | Hospital_2 | F      | Dec-11            | Jan-12            | 87                               | 42731                           | 1                                              | 1          |
| chart_45                 | Hospital_2 | M      | Jan-12            | Jan-12            | 43                               | 42731                           | 1                                              | 1          |
| chart_46                 | Hospital_2 | F      | Jan-12            | Jan-12            | 81                               | 42731                           | 1                                              | 1          |
| chart_47                 | Hospital_2 | M      | Feb-12            | Feb-12            | 92                               | 42731                           | 1                                              | 1          |
| chart_48                 | Hospital_2 | F      | Feb-12            | Mar-12            | 88                               | 42731                           | 1                                              | 1          |
| chart_49                 | Hospital_2 | F      | Feb-12            | Mar-12            | 72                               | 42731                           | 1                                              | 1          |
| chart_50                 | Hospital_2 | M      | Apr-12            | Apr-12            | 76                               | 42731                           | 1                                              | 1          |
| chart_51                 | Hospital_2 | M      | Apr-12            | Apr-12            | 54                               | 42731                           | 1                                              | 1          |
| chart_52                 | Hospital_2 | M      | Apr-12            | Apr-12            | 63                               | 42731                           | 1                                              | 1          |
| chart_53                 | Hospital_2 | F      | May-12            | May-12            | 73                               | 42731                           | 1                                              | 1          |
| chart_54                 | Hospital_2 | M      | Jun-12            | Jun-12            | 77                               | 42731                           | 1                                              | 1          |
| chart_55                 | Hospital_2 | F      | Jun-12            | Jun-12            | 78                               | 42731                           | 1                                              | 1          |
| chart_56                 | Hospital_2 | M      | Sep-12            | Sep-12            | 82                               | 42731                           | 1                                              | 1          |
| chart_57                 | Hospital_2 | M      | Sep-12            | Oct-12            | 85                               | 42731                           | 1                                              | 1          |
| chart_58                 | Hospital_2 | M      | Nov-12            | Nov-12            | 77                               | 42732                           | 1                                              | 1          |
| chart_59                 | Hospital_2 | F      | Nov-12            | Nov-12            | 55                               | 42731                           | 1                                              | 1          |
| chart_60                 | Hospital_2 | F      | Nov-12            | Dec-12            | 77                               | 42731                           | 1                                              | 1          |
| chart_61                 | Hospital_2 | M      | Dec-12            | Dec-12            | 54                               | 42731                           | 1                                              | 1          |
| chart_62                 | Hospital_2 | F      | Jan-13            | Jan-13            | 85                               | 42731                           | 2                                              | 0          |
| chart_63                 | Hospital_2 | F      | Jan-13            | Jan-13            | 63                               | 42731                           | 1                                              | 1          |
| chart_64                 | Hospital_2 | F      | Jan-13            | Jan-13            | 89                               | 42731                           | 1                                              | 1          |
| chart_65                 | Hospital_2 | M      | Jan-13            | Jan-13            | 62                               | 42731                           | 1                                              | 1          |
| chart_66                 | Hospital_2 | M      | Feb-13            | Feb-13            | --                               | 42731                           | n.a.                                           | n.a.       |
| chart_67                 | Hospital_2 | M      | Mar-13            | Mar-13            | 77                               | 42732                           | 1                                              | 1          |

| Number<br>Clinical Chart | Hospital   | Gender | Admission<br>date | Discharge<br>date | Patient's<br>age on<br>admission | Primary<br>Diagnosis<br>(ICD-9) | ECG abnormal<br>with presence<br>of AF/Flutter | Validation |
|--------------------------|------------|--------|-------------------|-------------------|----------------------------------|---------------------------------|------------------------------------------------|------------|
| chart_68                 | Hospital_2 | F      | Mar-13            | Mar-13            | 93                               | 42731                           | 1                                              | 1          |
| chart_69                 | Hospital_2 | M      | Apr-13            | Apr-13            | 68                               | 42732                           | 1                                              | 1          |
| chart_70                 | Hospital_2 | F      | Apr-13            | May-13            | 76                               | 42732                           | 1                                              | 1          |
| chart_71                 | Hospital_2 | F      | May-13            | May-13            | 80                               | 42732                           | 1                                              | 1          |
| chart_72                 | Hospital_2 | F      | Jul-13            | Jul-13            | 71                               | 42732                           | 1                                              | 1          |
| chart_73                 | Hospital_2 | F      | Nov-13            | Nov-13            | 71                               | 42731                           | 1                                              | 1          |
| chart_74                 | Hospital_2 | F      | Dec-13            | Dec-13            | 56                               | 42731                           | 1                                              | 1          |
| chart_75                 | Hospital_2 | F      | Dec-13            | Dec-13            | 66                               | 42731                           | 0                                              | 0          |
| chart_76                 | Hospital_2 | F      | Dec-13            | Dec-13            | 76                               | 42731                           | 1                                              | 1          |
| chart_77                 | Hospital_2 | M      | Jan-14            | Jan-14            | 70                               | 42731                           | 1                                              | 1          |
| chart_78                 | Hospital_2 | M      | Jan-14            | Jan-14            | 71                               | 42731                           | 1                                              | 1          |
| chart_79                 | Hospital_2 | M      | Jan-14            | Jan-14            | 76                               | 42731                           | 1                                              | 1          |
| chart_80                 | Hospital_2 | F      | Mar-14            | Mar-14            | 89                               | 42731                           | 1                                              | 1          |
| chart_81                 | Hospital_2 | F      | Mar-14            | Mar-14            | 75                               | 42731                           | 1                                              | 1          |
| chart_82                 | Hospital_2 | F      | Apr-14            | Apr-14            | 96                               | 42731                           | 1                                              | 1          |
| chart_83                 | Hospital_2 | M      | Jun-14            | Jun-14            | 74                               | 42731                           | 1                                              | 1          |
| chart_84                 | Hospital_2 | F      | Jun-14            | Jun-14            | 82                               | 42732                           | 1                                              | 1          |
| chart_85                 | Hospital_2 | M      | Aug-14            | Aug-14            | 84                               | 42731                           | 1                                              | 1          |
| chart_86                 | Hospital_2 | M      | Oct-14            | Oct-14            | 76                               | 42731                           | 1                                              | 1          |
| chart_87                 | Hospital_2 | F      | Nov-14            | Nov-14            | 95                               | 42731                           | 1                                              | 1          |
| chart_88                 | Hospital_2 | F      | Nov-14            | Nov-14            | 78                               | 42731                           | 1                                              | 1          |
| chart_89                 | Hospital_2 | M      | Dec-14            | Dec-14            | 82                               | 42731                           | 1                                              | 1          |
| chart_90                 | Hospital_3 | M      | Sep-12            | Sep-12            | 67                               | 42731                           | 1                                              | 1          |
| chart_91                 | Hospital_3 | M      | Dec-12            | Dec-12            | 64                               | 42731                           | 1                                              | 1          |
| chart_92                 | Hospital_3 | M      | Apr-13            | May-13            | 77                               | 42731                           | 1                                              | 1          |
| chart_93                 | Hospital_3 | M      | May-13            | May-13            | 61                               | 42731                           | 1                                              | 1          |
| chart_94                 | Hospital_3 | F      | Jun-13            | Jun-13            | 77                               | 42731                           | 0                                              | 0          |
| chart_95                 | Hospital_3 | M      | Apr-14            | Apr-14            | 71                               | 42731                           | 1                                              | 1          |
| chart_96                 | Hospital_4 | M      | Jan-12            | Jan-12            | 64                               | 42732                           | 1                                              | 1          |
| chart_97                 | Hospital_4 | M      | Jan-12            | Jan-12            | 69                               | 42731                           | 1                                              | 1          |
| chart_98                 | Hospital_4 | M      | Jun-12            | Jun-12            | 64                               | 42732                           | 1                                              | 1          |
| chart_99                 | Hospital_4 | F      | Jul-12            | Jul-12            | 84                               | 42731                           | 1                                              | 1          |
| chart_100                | Hospital_4 | M      | Dec-13            | Dec-13            | 77                               | 42731                           | 1                                              | 1          |
| chart_101                | Hospital_4 | M      | May-14            | May-14            | 73                               | 42731                           | 1                                              | 1          |
| chart_102                | Hospital_4 | F      | Jun-14            | Jun-14            | 79                               | 42731                           | 1                                              | 1          |

| Number<br>Clinical Chart | Hospital   | Gender | Admission<br>date | Discharge<br>date | Patient's<br>age on<br>admission | Primary<br>Diagnosis<br>(ICD-9) | ECG abnormal<br>with presence<br>of AF/Flutter | Validation |
|--------------------------|------------|--------|-------------------|-------------------|----------------------------------|---------------------------------|------------------------------------------------|------------|
| chart_103                | Hospital_4 | M      | Jun-14            | Jun-14            | 67                               | 42731                           | 1                                              | 1          |
| chart_104                | Hospital_5 | F      | Dec-11            | Jan-12            | 87                               | 42731                           | 1                                              | 1          |
| chart_105                | Hospital_5 | F      | Feb-12            | Mar-12            | 92                               | 42731                           | 1                                              | 1          |
| chart_106                | Hospital_5 | F      | Jun-12            | Jun-12            | 87                               | 42731                           | 1                                              | 1          |
| chart_107                | Hospital_5 | F      | Aug-12            | Aug-12            | 82                               | 42731                           | 1                                              | 1          |
| chart_108                | Hospital_5 | F      | Aug-12            | Aug-12            | 89                               | 42731                           | 1                                              | 1          |
| chart_109                | Hospital_5 | F      | Jul-13            | Jul-13            | 90                               | 42731                           | 1                                              | 1          |
| chart_110                | Hospital_5 | M      | Oct-13            | Oct-13            | 81                               | 42732                           | 1                                              | 1          |
| chart_111                | Hospital_5 | M      | May-14            | May-14            | 69                               | 42732                           | 1                                              | 1          |
| chart_112                | Hospital_5 | M      | May-14            | May-14            | 79                               | 42731                           | 1                                              | 1          |
| chart_113                | Hospital_6 | M      | Sep-12            | Sep-12            | 83                               | 42731                           | 1                                              | 1          |
| chart_114                | Hospital_6 | F      | Nov-12            | Nov-12            | 82                               | 42731                           | 1                                              | 1          |
| chart_115                | Hospital_6 | M      | Jan-13            | Jan-13            | 75                               | 42731                           | 1                                              | 1          |
| chart_116                | Hospital_6 | M      | Jan-13            | Jan-13            | 62                               | 42731                           | 1                                              | 1          |
| chart_117                | Hospital_6 | M      | Sep-13            | Sep-13            | 56                               | 42731                           | 1                                              | 1          |
| chart_118                | Hospital_6 | F      | Oct-13            | Oct-13            | 52                               | 42731                           | 1                                              | 1          |
| chart_119                | Hospital_6 | M      | Oct-13            | Oct-13            | 70                               | 42731                           | 1                                              | 1          |
| chart_120                | Hospital_6 | F      | Jan-14            | Feb-14            | 87                               | 42731                           | 1                                              | 1          |
| chart_121                | Hospital_6 | M      | Jan-14            | Feb-14            | 71                               | 42731                           | 1                                              | 1          |
| chart_122                | Hospital_6 | F      | Mar-14            | Mar-14            | 80                               | 42731                           | 1                                              | 1          |
| chart_123                | Hospital_6 | M      | Apr-14            | Apr-14            | 71                               | 42731                           | 1                                              | 1          |
| chart_124                | Hospital_6 | M      | Jun-14            | Jun-14            | 81                               | 42731                           | 1                                              | 1          |
| chart_125                | Hospital_6 | M      | Jul-14            | Jul-14            | 80                               | 42731                           | 1                                              | 1          |
| chart_126                | Hospital_6 | M      | Oct-14            | Oct-14            | 68                               | 42731                           | 1                                              | 1          |
| chart_127                | Hospital_6 | F      | Dec-14            | Dec-14            | 88                               | 42731                           | 1                                              | 1          |
| chart_128                | Hospital_6 | M      | Dec-14            | Dec-14            | 68                               | 42731                           | 1                                              | 1          |
| chart_129                | Hospital_7 | F      | Oct-12            | Oct-12            | 98                               | 42731                           | 1                                              | 1          |
| chart_130                | Hospital_7 | M      | Nov-12            | Nov-12            | 68                               | 42731                           | 1                                              | 1          |

Legend: 0=no; 1=yes; 2=not reported; n.a.=clinical chart not available



## Heart failure

| Number<br>Clinical Chart | Hospital   | Gender | Admission<br>date | Discharge<br>date | Patient's age<br>on admission | Primary<br>Diagnosis<br>(ICD-9) | Symptoms of<br>heart failure | ECG<br>abnormal | BNP high | Echocardiog<br>ram<br>abnormal | Validation |
|--------------------------|------------|--------|-------------------|-------------------|-------------------------------|---------------------------------|------------------------------|-----------------|----------|--------------------------------|------------|
| Chart_1                  | Hospital_1 | M      | Feb-12            | Feb-12            | 71                            | 4280                            | 1                            | 1               | 1        | 1                              | 1          |
| Chart_2                  | Hospital_1 | M      | Feb-12            | Feb-12            | 82                            | 4281                            | 1                            | 1               | 1        | 1                              | 1          |
| Chart_3                  | Hospital_1 | F      | Mar-12            | Apr-12            | 82                            | 4289                            | 1                            | 0               | 2        | 1                              | 1          |
| Chart_4                  | Hospital_1 | F      | Apr-12            | Apr-12            | 69                            | 4281                            | 1                            | 1               | 1        | 1                              | 1          |
| Chart_5                  | Hospital_1 | F      | Apr-12            | Apr-12            | 75                            | 4281                            | 1                            | 1               | 1        | 1                              | 1          |
| Chart_6                  | Hospital_1 | F      | Jun-12            | Jul-12            | 71                            | 4280                            | 1                            | 0               | 1        | 1                              | 1          |
| Chart_7                  | Hospital_1 | M      | Aug-12            | Sep-12            | 73                            | 4281                            | 1                            | 0               | 1        | 1                              | 1          |
| Chart_8                  | Hospital_1 | F      | Oct-12            | Oct-12            | 69                            | 4281                            | 1                            | 1               | 1        | 1                              | 1          |
| Chart_9                  | Hospital_1 | F      | Oct-12            | Oct-12            | 75                            | 4280                            | 1                            | 1               | 1        | 1                              | 1          |
| Chart_10                 | Hospital_1 | F      | Dec-12            | Dec-12            | 78                            | 42841                           | 1                            | 1               | 1        | 0                              | 1          |
| Chart_11                 | Hospital_1 | F      | Mar-13            | Mar-13            | 69                            | 42833                           | 1                            | 1               | 1        | 1                              | 1          |
| Chart_12                 | Hospital_1 | F      | Apr-13            | Apr-13            | --                            | 4280                            | n.a.                         | n.a.            | n.a.     | n.a.                           | n.a.       |
| Chart_13                 | Hospital_1 | F      | May-13            | May-13            | 79                            | 4280                            | 1                            | 1               | 2        | 1                              | 1          |
| Chart_14                 | Hospital_1 | F      | Jun-13            | Jun-13            | 84                            | 4281                            | 1                            | 1               | 1        | 1                              | 1          |
| Chart_15                 | Hospital_1 | F      | Sep-13            | Sep-13            | 77                            | 4280                            | 1                            | 1               | 0        | 2                              | 1          |
| Chart_16                 | Hospital_1 | M      | Sep-13            | Sep-13            | 77                            | 4281                            | 1                            | 1               | 1        | 1                              | 1          |
| Chart_17                 | Hospital_1 | F      | Oct-13            | Oct-13            | 89                            | 4280                            | 1                            | 1               | 1        | 1                              | 1          |
| Chart_18                 | Hospital_1 | M      | Nov-13            | Nov-13            | 73                            | 4280                            | 1                            | 1               | 1        | 1                              | 1          |
| Chart_19                 | Hospital_1 | F      | Nov-13            | Dec-13            | 86                            | 4281                            | 1                            | 0               | 1        | 1                              | 1          |
| Chart_20                 | Hospital_1 | M      | Dec-13            | Dec-13            | 78                            | 4280                            | 1                            | 1               | 2        | 2                              | 1          |
| Chart_21                 | Hospital_1 | M      | Dec-13            | Dec-13            | 80                            | 4280                            | 1                            | 1               | 1        | 1                              | 1          |
| Chart_22                 | Hospital_1 | M      | Jan-14            | Jan-14            | 59                            | 4280                            | 1                            | 1               | 1        | 1                              | 1          |
| Chart_23                 | Hospital_1 | F      | Jan-14            | Jan-14            | 70                            | 4281                            | 1                            | 1               | 1        | 1                              | 1          |
| Chart_24                 | Hospital_1 | F      | Jan-14            | Jan-14            | 91                            | 4280                            | 1                            | 1               | 1        | 1                              | 1          |
| Chart_25                 | Hospital_1 | M      | Jan-14            | Feb-14            | 97                            | 4280                            | 1                            | 1               | 1        | 2                              | 1          |
| Chart_26                 | Hospital_1 | M      | Feb-14            | Mar-14            | 83                            | 4280                            | 1                            | 1               | 1        | 1                              | 1          |
| Chart_27                 | Hospital_1 | F      | Feb-14            | Mar-14            | 62                            | 4281                            | 1                            | 1               | 1        | 1                              | 1          |
| Chart_28                 | Hospital_1 | M      | Mar-14            | Mar-14            | 88                            | 42823                           | 1                            | 1               | 1        | 2                              | 1          |
| Chart_29                 | Hospital_1 | F      | Mar-14            | Apr-14            | 89                            | 4280                            | 1                            | 0               | 1        | 1                              | 1          |
| Chart_30                 | Hospital_1 | F      | Apr-14            | Apr-14            | 91                            | 4281                            | 1                            | 1               | 0        | 0                              | 1          |
| Chart_31                 | Hospital_1 | F      | May-14            | May-14            | 52                            | 4281                            | 1                            | 1               | 2        | 2                              | 1          |
| Chart_32                 | Hospital_1 | M      | Jul-14            | Jul-14            | 89                            | 4281                            | 1                            | 1               | 1        | 2                              | 1          |
| Chart_33                 | Hospital_1 | F      | Jul-14            | Jul-14            | 83                            | 4281                            | 1                            | 1               | 1        | 1                              | 1          |

| Number<br>Clinical Chart | Hospital   | Gender | Admission<br>date | Discharge<br>date | Patient's age<br>on admission | Primary<br>Diagnosis<br>(ICD-9) | Symptoms of<br>heart failure | ECG<br>abnormal | BNP high | Echocardiog<br>ram<br>abnormal | Validation |
|--------------------------|------------|--------|-------------------|-------------------|-------------------------------|---------------------------------|------------------------------|-----------------|----------|--------------------------------|------------|
| Chart_34                 | Hospital_1 | F      | Aug-14            | Aug-14            | 71                            | 4289                            | 1                            | 1               | 2        | 0                              | 1          |
| Chart_35                 | Hospital_1 | F      | Aug-14            | Sep-14            | --                            | 4280                            | n.a.                         | n.a.            | n.a.     | n.a.                           | n.a.       |
| Chart_36                 | Hospital_1 | F      | Aug-14            | Aug-14            | 86                            | 42823                           | 1                            | 1               | 1        | 1                              | 1          |
| Chart_37                 | Hospital_1 | M      | Sep-14            | Sep-14            | 87                            | 4281                            | 1                            | 1               | 1        | 1                              | 1          |
| Chart_38                 | Hospital_2 | F      | Feb-12            | Feb-12            | 92                            | 4280                            | 1                            | 1               | 2        | 2                              | 1          |
| Chart_39                 | Hospital_2 | M      | Feb-12            | Feb-12            | 76                            | 4280                            | 1                            | 0               | 2        | 1                              | 1          |
| Chart_40                 | Hospital_2 | F      | Feb-12            | Mar-12            | 92                            | 4280                            | 1                            | 1               | 2        | 2                              | 1          |
| Chart_41                 | Hospital_2 | F      | Feb-12            | Mar-12            | 80                            | 4280                            | 1                            | 1               | 2        | 2                              | 1          |
| Chart_42                 | Hospital_2 | M      | Feb-12            | Feb-12            | 83                            | 4280                            | 1                            | 1               | 2        | 2                              | 1          |
| Chart_43                 | Hospital_2 | F      | Mar-12            | Mar-12            | 66                            | 4280                            | 0                            | 1               | 2        | 2                              | 0          |
| Chart_44                 | Hospital_2 | F      | Apr-12            | Apr-12            | 86                            | 4280                            | 1                            | 0               | 2        | 2                              | 0          |
| Chart_45                 | Hospital_2 | F      | Apr-12            | Apr-12            | 97                            | 4280                            | 1                            | 0               | 2        | 2                              | 0          |
| Chart_46                 | Hospital_2 | F      | Apr-12            | May-12            | 73                            | 4280                            | 1                            | 1               | 2        | 1                              | 1          |
| Chart_47                 | Hospital_2 | F      | May-12            | May-12            | 72                            | 4280                            | 1                            | 1               | 2        | 2                              | 1          |
| Chart_48                 | Hospital_2 | M      | May-12            | May-12            | 86                            | 4280                            | 1                            | 1               | 2        | 2                              | 1          |
| Chart_49                 | Hospital_2 | M      | Jul-12            | Jul-12            | 88                            | 4280                            | 1                            | 2               | 2        | 2                              | 0          |
| Chart_50                 | Hospital_2 | M      | Oct-12            | Oct-12            | 77                            | 4280                            | 1                            | 1               | 2        | 1                              | 1          |
| Chart_51                 | Hospital_2 | M      | Oct-12            | Oct-12            | --                            | 4280                            | n.a.                         | n.a.            | n.a.     | n.a.                           | n.a.       |
| Chart_52                 | Hospital_2 | M      | Dec-12            | Jan-13            | 70                            | 4280                            | 1                            | 1               | 2        | 1                              | 1          |
| Chart_53                 | Hospital_2 | F      | Jan-13            | Jan-13            | 84                            | 4280                            | 1                            | 1               | 2        | 2                              | 1          |
| Chart_54                 | Hospital_2 | M      | Jan-13            | Jan-13            | 91                            | 4280                            | 1                            | 1               | 2        | 2                              | 1          |
| Chart_55                 | Hospital_2 | M      | Jan-13            | Jan-13            | 89                            | 4280                            | 1                            | 1               | 2        | 2                              | 1          |
| Chart_56                 | Hospital_2 | F      | Feb-13            | Feb-13            | 86                            | 4281                            | 1                            | 1               | 2        | 2                              | 1          |
| Chart_57                 | Hospital_2 | F      | Mar-13            | Apr-13            | 78                            | 4280                            | 1                            | 1               | 2        | 2                              | 1          |
| Chart_58                 | Hospital_2 | M      | Apr-13            | Apr-13            | 93                            | 4280                            | 1                            | 2               | 2        | 2                              | 0          |
| Chart_59                 | Hospital_2 | F      | Apr-13            | Apr-13            | 83                            | 4280                            | 1                            | 1               | 2        | 2                              | 1          |
| Chart_60                 | Hospital_2 | M      | May-13            | Jun-13            | 87                            | 4280                            | 1                            | 1               | 2        | 1                              | 1          |
| Chart_61                 | Hospital_2 | F      | Jul-13            | Aug-13            | 85                            | 4280                            | 1                            | 0               | 2        | 2                              | 0          |
| Chart_62                 | Hospital_2 | F      | Sep-13            | Sep-13            | 34                            | 4280                            | 1                            | 0               | 2        | 2                              | 0          |
| Chart_63                 | Hospital_2 | M      | Sep-13            | Oct-13            | 91                            | 4280                            | 1                            | 1               | 2        | 2                              | 1          |
| Chart_64                 | Hospital_2 | F      | Oct-13            | Nov-13            | 85                            | 4280                            | 1                            | 1               | 2        | 1                              | 1          |
| Chart_65                 | Hospital_2 | M      | Nov-13            | Nov-13            | 82                            | 4280                            | 1                            | 1               | 2        | 1                              | 1          |
| Chart_66                 | Hospital_2 | M      | Nov-13            | Nov-13            | 71                            | 4280                            | 1                            | 1               | 2        | 1                              | 1          |
| Chart_67                 | Hospital_2 | F      | Nov-13            | Dec-13            | 92                            | 4280                            | 1                            | 1               | 2        | 1                              | 1          |
| Chart_68                 | Hospital_2 | M      | Mar-14            | Mar-14            | 73                            | 4280                            | 1                            | 1               | 2        | 1                              | 1          |

| Number<br>Clinical Chart | Hospital   | Gender | Admission<br>date | Discharge<br>date | Patient's age<br>on admission | Primary<br>Diagnosis<br>(ICD-9) | Symptoms of<br>heart failure | ECG<br>abnormal | BNP high | Echocardiog<br>ram<br>abnormal | Validation |
|--------------------------|------------|--------|-------------------|-------------------|-------------------------------|---------------------------------|------------------------------|-----------------|----------|--------------------------------|------------|
| Chart_69                 | Hospital_2 | F      | Mar-14            | Mar-14            | 86                            | 4280                            | 1                            | 1               | 2        | 2                              | 1          |
| Chart_70                 | Hospital_2 | F      | Nov-14            | Dec-14            | 99                            | 4280                            | 1                            | 1               | 2        | 2                              | 1          |
| Chart_71                 | Hospital_2 | F      | Dec-14            | Dec-14            | 81                            | 4280                            | 1                            | 1               | 2        | 2                              | 1          |
| Chart_72                 | Hospital_2 | M      | Dec-14            | Dec-14            | 52                            | 4280                            | 1                            | 1               | 2        | 1                              | 1          |
| Chart_73                 | Hospital_2 | M      | Dec-14            | Dec-14            | 79                            | 4280                            | 1                            | 1               | 2        | 2                              | 1          |
| Chart_74                 | Hospital_3 | F      | Mar-12            | Apr-12            | 74                            | 4280                            | 1                            | 1               | 2        | 1                              | 1          |
| Chart_75                 | Hospital_3 | F      | Aug-12            | Aug-12            | 87                            | 4281                            | 1                            | 2               | 1        | 2                              | 1          |
| Chart_76                 | Hospital_3 | M      | Dec-12            | Jan-13            | 79                            | 4281                            | 1                            | 1               | 2        | 1                              | 1          |
| Chart_77                 | Hospital_3 | M      | Jan-13            | Jan-13            | 78                            | 4281                            | 1                            | 1               | 1        | 1                              | 1          |
| Chart_78                 | Hospital_3 | F      | Jun-13            | Jun-13            | 78                            | 4281                            | 1                            | 1               | 1        | 1                              | 1          |
| Chart_79                 | Hospital_3 | M      | Sep-13            | Sep-13            | 87                            | 4281                            | 1                            | 1               | 2        | 2                              | 1          |
| Chart_80                 | Hospital_3 | M      | Nov-13            | Dec-13            | 81                            | 42843                           | 1                            | 1               | 1        | 1                              | 1          |
| Chart_81                 | Hospital_3 | M      | Jan-14            | Feb-14            | 80                            | 42843                           | 1                            | 1               | 2        | 1                              | 1          |
| Chart_82                 | Hospital_3 | F      | Mar-14            | Mar-14            | 68                            | 42843                           | 1                            | 1               | 1        | 1                              | 1          |
| Chart_83                 | Hospital_3 | F      | Apr-14            | Apr-14            | 74                            | 42843                           | 1                            | 1               | 2        | 1                              | 1          |
| Chart_84                 | Hospital_3 | M      | Jul-14            | Jul-14            | 74                            | 42843                           | 1                            | 1               | 1        | 1                              | 1          |
| Chart_85                 | Hospital_3 | M      | Oct-14            | Oct-14            | 85                            | 4280                            | 1                            | 1               | 2        | 2                              | 1          |
| Chart_86                 | Hospital_4 | F      | Feb-12            | Feb-12            | 78                            | 4281                            | 1                            | 0               | 0        | 0                              | 0          |
| Chart_87                 | Hospital_4 | M      | May-12            | May-12            | 78                            | 4280                            | 1                            | 1               | 1        | 2                              | 1          |
| Chart_88                 | Hospital_4 | M      | Sep-12            | Oct-12            | 77                            | 4281                            | 1                            | 1               | 2        | 1                              | 1          |
| Chart_89                 | Hospital_4 | M      | Oct-12            | Oct-12            | 80                            | 4280                            | 1                            | 1               | 1        | 1                              | 1          |
| Chart_90                 | Hospital_4 | F      | Nov-12            | Nov-12            | 83                            | 4280                            | 1                            | 0               | 1        | 2                              | 1          |
| Chart_91                 | Hospital_4 | F      | Apr-13            | Apr-13            | 79                            | 4280                            | 1                            | 1               | 1        | 2                              | 1          |
| Chart_92                 | Hospital_4 | M      | Jun-13            | Jul-13            | 89                            | 4280                            | 1                            | 1               | 2        | 1                              | 1          |
| Chart_93                 | Hospital_4 | F      | Dec-13            | Jan-14            | 81                            | 4281                            | 1                            | 0               | 2        | 1                              | 1          |
| Chart_94                 | Hospital_4 | F      | Jul-14            | Jul-14            | 79                            | 4281                            | 1                            | 1               | 2        | 1                              | 1          |
| Chart_95                 | Hospital_5 | M      | Dec-11            | Jan-12            | 83                            | 4280                            | 1                            | 1               | 2        | 2                              | 1          |
| Chart_96                 | Hospital_5 | F      | Jan-12            | Jan-12            | 88                            | 4281                            | 1                            | 1               | 2        | 1                              | 1          |
| Chart_97                 | Hospital_5 | F      | Mar-12            | Mar-12            | 89                            | 4280                            | 1                            | 1               | 2        | 2                              | 1          |
| Chart_98                 | Hospital_5 | M      | Apr-12            | May-12            | 83                            | 4281                            | 1                            | 1               | 2        | 1                              | 1          |
| Chart_99                 | Hospital_5 | M      | Aug-12            | Aug-12            | 83                            | 4280                            | 1                            | 2               | 1        | 1                              | 1          |
| Chart_100                | Hospital_5 | M      | Nov-12            | Dec-12            | 86                            | 4280                            | 1                            | 1               | 2        | 1                              | 1          |
| Chart_101                | Hospital_5 | F      | Feb-13            | Feb-13            | 84                            | 4280                            | 1                            | 1               | 2        | 0                              | 1          |
| Chart_102                | Hospital_5 | F      | Feb-13            | Mar-13            | 90                            | 4280                            | 1                            | 1               | 2        | 1                              | 1          |
| Chart_103                | Hospital_5 | F      | Mar-13            | Mar-13            | 85                            | 4280                            | 1                            | 1               | 2        | 1                              | 1          |

| Number<br>Clinical Chart | Hospital   | Gender | Admission<br>date | Discharge<br>date | Patient's age<br>on admission | Primary<br>Diagnosis<br>(ICD-9) | Symptoms of<br>heart failure | ECG<br>abnormal | BNP high | Echocardiog<br>ram<br>abnormal | Validation |
|--------------------------|------------|--------|-------------------|-------------------|-------------------------------|---------------------------------|------------------------------|-----------------|----------|--------------------------------|------------|
| Chart_104                | Hospital_5 | F      | Mar-13            | Apr-13            | 75                            | 4281                            | 1                            | 1               | 2        | 1                              | 1          |
| Chart_105                | Hospital_5 | F      | Feb-14            | Feb-14            | 83                            | 4280                            | 1                            | 1               | 1        | 2                              | 1          |
| Chart_106                | Hospital_5 | M      | Jun-14            | Jun-14            | 64                            | 4280                            | 0                            | 1               | 2        | 1                              | 1          |
| Chart_107                | Hospital_5 | M      | Aug-14            | Aug-14            | 80                            | 4280                            | 1                            | 1               | 2        | 1                              | 1          |
| Chart_108                | Hospital_5 | F      | Oct-14            | Nov-14            | 80                            | 4280                            | 1                            | 1               | 1        | 0                              | 1          |
| Chart_109                | Hospital_5 | M      | Nov-14            | Nov-14            | 77                            | 4280                            | 1                            | 0               | 2        | 1                              | 1          |
| Chart_110                | Hospital_6 | F      | Aug-12            | Aug-12            | 82                            | 4281                            | 1                            | 0               | 1        | 0                              | 1          |
| Chart_111                | Hospital_6 | M      | Aug-12            | Sep-12            | 88                            | 4280                            | 1                            | 1               | 1        | 1                              | 1          |
| Chart_112                | Hospital_6 | M      | Jan-13            | Jan-13            | 86                            | 4280                            | 1                            | 1               | 1        | 1                              | 1          |
| Chart_113                | Hospital_6 | F      | May-13            | May-13            | 81                            | 4280                            | 1                            | 1               | 1        | 0                              | 1          |
| Chart_114                | Hospital_6 | M      | Jun-13            | Jun-13            | 60                            | 42830                           | 1                            | 0               | 2        | 1                              | 1          |
| Chart_115                | Hospital_6 | F      | Jun-13            | Jun-13            | 95                            | 4280                            | 1                            | 1               | 1        | 0                              | 1          |
| Chart_116                | Hospital_6 | F      | Dec-13            | Dec-13            | 82                            | 4280                            | 1                            | 1               | 1        | 2                              | 1          |
| Chart_117                | Hospital_6 | M      | Mar-14            | Apr-14            | 89                            | 4280                            | 1                            | 1               | 2        | 2                              | 1          |
| Chart_118                | Hospital_6 | F      | Oct-14            | Oct-14            | 86                            | 42841                           | 1                            | 1               | 2        | 2                              | 1          |
| Chart_119                | Hospital_6 | M      | Oct-14            | Oct-14            | 75                            | 42823                           | 1                            | 1               | 2        | 1                              | 1          |
| Chart_120                | Hospital_6 | F      | Dec-14            | Dec-14            | 84                            | 42830                           | 1                            | 1               | 1        | 1                              | 1          |
| Chart_121                | Hospital_6 | M      | Dec-14            | Dec-14            | 91                            | 42841                           | 1                            | 0               | 1        | 1                              | 1          |
| Chart_122                | Hospital_7 | F      | Jul-12            | Aug-12            | 85                            | 4281                            | 1                            | 1               | 1        | 1                              | 1          |
| Chart_123                | Hospital_7 | M      | Sep-12            | Sep-12            | 95                            | 4280                            | 1                            | 1               | 1        | 2                              | 1          |
| Chart_124                | Hospital_7 | M      | Oct-12            | Oct-12            | 98                            | 4280                            | 1                            | 1               | 1        | 2                              | 1          |
| Chart_125                | Hospital_7 | M      | Jun-13            | Jun-13            | 81                            | 4280                            | 1                            | 1               | 2        | 0                              | 1          |
| Chart_126                | Hospital_7 | M      | Aug-13            | Aug-13            | 87                            | 4280                            | 1                            | 1               | 2        | 0                              | 1          |
| Chart_127                | Hospital_7 | F      | Oct-13            | Oct-13            | 77                            | 4280                            | 1                            | 1               | 1        | 2                              | 1          |
| Chart_128                | Hospital_7 | M      | Jan-14            | Jan-14            | 87                            | 4280                            | 1                            | 1               | 1        | 2                              | 1          |
| Chart_129                | Hospital_7 | M      | Apr-14            | Apr-14            | 84                            | 4280                            | 1                            | 1               | 1        | 1                              | 1          |
| Chart_130                | Hospital_7 | M      | Aug-14            | Aug-14            | 88                            | 4280                            | 1                            | 1               | 1        | 0                              | 1          |

Legend: 0=no; 1=yes; 2=not reported; n.a.=clinical chart not available

## Non-cases

| Number<br>Clinical Chart | Hospital   | Gender | Admission<br>date | Discharge<br>date | Patient's age<br>on admission | Primary<br>Diagnosis<br>(ICD-9) | Non-cases<br>group for<br>myocardial<br>infarction -<br>Validation | Non-cases group<br>for AF/flutter -<br>Validation | Non-cases group<br>for heart failure -<br>Validation |
|--------------------------|------------|--------|-------------------|-------------------|-------------------------------|---------------------------------|--------------------------------------------------------------------|---------------------------------------------------|------------------------------------------------------|
| Chart_1                  | Hospital_1 | M      | Feb-12            | Feb-12            | --                            | 4275                            | n.a.                                                               | n.a.                                              | n.a.                                                 |
| Chart_2                  | Hospital_1 | F      | Feb-12            | Mar-12            | 89                            | 431                             | 1                                                                  | 1                                                 | 1                                                    |
| Chart_3                  | Hospital_1 | M      | Jul-12            | Jul-12            | 75                            | 41401                           | 1                                                                  | 1                                                 | 1                                                    |
| Chart_4                  | Hospital_1 | M      | Aug-12            | Aug-12            | 58                            | 43401                           | 1                                                                  | 1                                                 | 1                                                    |
| Chart_5                  | Hospital_1 | F      | Sep-12            | Sep-12            | 55                            | 41401                           | 1                                                                  | 1                                                 | 1                                                    |
| Chart_6                  | Hospital_1 | M      | Sep-12            | Oct-12            | 88                            | 431                             | 1                                                                  | 1                                                 | 1                                                    |
| Chart_7                  | Hospital_1 | F      | Nov-12            | Nov-12            | 82                            | 4412                            | 1                                                                  | 1                                                 | 0                                                    |
| Chart_8                  | Hospital_1 | M      | Nov-12            | Nov-12            | 60                            | 41401                           | 1                                                                  | 1                                                 | 1                                                    |
| Chart_9                  | Hospital_1 | F      | Dec-12            | Dec-12            | 65                            | 42651                           | 1                                                                  | 0                                                 | 1                                                    |
| Chart_10                 | Hospital_1 | M      | Feb-13            | Feb-13            | 77                            | 431                             | 1                                                                  | 1                                                 | 1                                                    |
| Chart_11                 | Hospital_1 | M      | Feb-13            | Feb-13            | 85                            | 41400                           | 1                                                                  | 1                                                 | 1                                                    |
| Chart_12                 | Hospital_1 | M      | Apr-13            | Apr-13            | 72                            | 4241                            | 1                                                                  | 1                                                 | 1                                                    |
| Chart_13                 | Hospital_1 | M      | Apr-13            | May-13            | 82                            | 4512                            | 1                                                                  | 0                                                 | 0                                                    |
| Chart_14                 | Hospital_1 | F      | Jun-13            | Jun-13            | 60                            | 4139                            | 1                                                                  | 1                                                 | 1                                                    |
| Chart_15                 | Hospital_1 | F      | Jun-13            | Jun-13            | 78                            | 4111                            | 1                                                                  | 1                                                 | 1                                                    |
| Chart_16                 | Hospital_1 | F      | Jun-13            | Jun-13            | 87                            | 4552                            | 1                                                                  | 1                                                 | 1                                                    |
| Chart_17                 | Hospital_1 | F      | Jul-13            | Jul-13            | --                            | 45119                           | n.a.                                                               | n.a.                                              | n.a.                                                 |
| Chart_18                 | Hospital_1 | M      | Jul-13            | Jul-13            | 83                            | 42781                           | 1                                                                  | 1                                                 | 1                                                    |
| Chart_19                 | Hospital_1 | F      | Sep-13            | Sep-13            | 79                            | 4580                            | 1                                                                  | 1                                                 | 1                                                    |
| Chart_20                 | Hospital_1 | M      | Sep-13            | Sep-13            | 78                            | 431                             | 1                                                                  | 1                                                 | 1                                                    |
| Chart_21                 | Hospital_1 | M      | Sep-13            | Oct-13            | 83                            | 43491                           | 1                                                                  | 1                                                 | 1                                                    |
| Chart_22                 | Hospital_1 | M      | Jan-14            | Jan-14            | 80                            | 4321                            | 1                                                                  | 1                                                 | 1                                                    |
| Chart_23                 | Hospital_1 | M      | Feb-14            | Feb-14            | 75                            | 42789                           | 1                                                                  | 1                                                 | 1                                                    |
| Chart_24                 | Hospital_1 | M      | Feb-14            | Mar-14            | 75                            | 4139                            | 1                                                                  | 1                                                 | 1                                                    |
| Chart_25                 | Hospital_1 | M      | Mar-14            | Mar-14            | 94                            | 45829                           | 1                                                                  | 1                                                 | 1                                                    |
| Chart_26                 | Hospital_1 | M      | Mar-14            | Apr-14            | --                            | 4239                            | n.a.                                                               | n.a.                                              | n.a.                                                 |
| Chart_27                 | Hospital_1 | M      | Mar-14            | Apr-14            | 86                            | 43491                           | 1                                                                  | 1                                                 | 1                                                    |
| Chart_28                 | Hospital_1 | F      | Jun-14            | Jun-14            | 20                            | 4372                            | 1                                                                  | 1                                                 | 1                                                    |
| Chart_29                 | Hospital_1 | M      | Jul-14            | Jul-14            | 79                            | 42781                           | 1                                                                  | 1                                                 | 1                                                    |
| Chart_30                 | Hospital_1 | M      | Jul-14            | Jul-14            | 84                            | 44422                           | 1                                                                  | 1                                                 | 1                                                    |
| Chart_31                 | Hospital_1 | M      | Sep-14            | Sep-14            | 74                            | 41401                           | 1                                                                  | 1                                                 | 0                                                    |

| Number<br>Clinical Chart | Hospital   | Gender | Admission<br>date | Discharge<br>date | Patient's age<br>on admission | Primary<br>Diagnosis<br>(ICD-9) | Non-cases<br>group for<br>myocardial<br>infarction -<br>Validation | Non-cases group<br>for AF/flutter -<br>Validation | Non-cases group<br>for heart failure -<br>Validation |
|--------------------------|------------|--------|-------------------|-------------------|-------------------------------|---------------------------------|--------------------------------------------------------------------|---------------------------------------------------|------------------------------------------------------|
| Chart_32                 | Hospital_1 | F      | Oct-14            | Oct-14            | 81                            | 4260                            | 1                                                                  | 1                                                 | 1                                                    |
| Chart_33                 | Hospital_1 | M      | Nov-14            | Nov-14            | 76                            | 41189                           | 0                                                                  | 1                                                 | 1                                                    |
| Chart_34                 | Hospital_2 | F      | Jan-12            | Jan-12            | 83                            | 40291                           | 1                                                                  | 1                                                 | 1                                                    |
| Chart_35                 | Hospital_2 | F      | Mar-12            | Mar-12            | 78                            | 43400                           | 1                                                                  | 1                                                 | 1                                                    |
| Chart_36                 | Hospital_2 | M      | Apr-12            | Apr-12            | 69                            | 41401                           | 1                                                                  | 1                                                 | 1                                                    |
| Chart_37                 | Hospital_2 | M      | Apr-12            | Apr-12            | 32                            | 4555                            | 1                                                                  | 1                                                 | 1                                                    |
| Chart_38                 | Hospital_2 | F      | Jul-12            | Jul-12            | 77                            | 4254                            | 1                                                                  | 1                                                 | 1                                                    |
| Chart_39                 | Hospital_2 | F      | Sep-12            | Sep-12            | 78                            | 43401                           | 1                                                                  | 1                                                 | 1                                                    |
| Chart_40                 | Hospital_2 | F      | Dec-12            | Dec-12            | 64                            | 41401                           | 1                                                                  | 1                                                 | 1                                                    |
| Chart_41                 | Hospital_2 | F      | Dec-12            | Dec-12            | 79                            | 431                             | 1                                                                  | 1                                                 | 1                                                    |
| Chart_42                 | Hospital_2 | M      | Feb-13            | Feb-13            | 84                            | 40210                           | 1                                                                  | 1                                                 | 1                                                    |
| Chart_43                 | Hospital_2 | M      | Feb-13            | Feb-13            | 66                            | 4149                            | 1                                                                  | 1                                                 | 1                                                    |
| Chart_44                 | Hospital_2 | M      | Apr-13            | May-13            | 73                            | 45119                           | 1                                                                  | 1                                                 | 1                                                    |
| Chart_45                 | Hospital_2 | F      | Dec-13            | Dec-13            | 87                            | 3968                            | 1                                                                  | 1                                                 | 1                                                    |
| Chart_46                 | Hospital_2 | F      | Jan-14            | Jan-14            | 63                            | 4541                            | 1                                                                  | 1                                                 | 1                                                    |
| Chart_47                 | Hospital_2 | F      | Apr-14            | Apr-14            | 57                            | 41401                           | 1                                                                  | 1                                                 | 1                                                    |
| Chart_48                 | Hospital_2 | M      | Apr-14            | May-14            | 83                            | 4240                            | 1                                                                  | 1                                                 | 1                                                    |
| Chart_49                 | Hospital_2 | M      | May-14            | May-14            | 64                            | 4149                            | 1                                                                  | 1                                                 | 1                                                    |
| Chart_50                 | Hospital_2 | F      | Aug-14            | Aug-14            | 88                            | 43401                           | 1                                                                  | 1                                                 | 1                                                    |
| Chart_51                 | Hospital_2 | F      | Aug-14            | Aug-14            | 75                            | 43401                           | 1                                                                  | 1                                                 | 1                                                    |
| Chart_52                 | Hospital_2 | F      | Oct-14            | Oct-14            | 72                            | 43400                           | 1                                                                  | 1                                                 | 1                                                    |
| Chart_53                 | Hospital_2 | M      | Oct-14            | Oct-14            | 81                            | 4358                            | 1                                                                  | 1                                                 | 1                                                    |
| Chart_54                 | Hospital_2 | F      | Oct-14            | Oct-14            | 75                            | 4321                            | 1                                                                  | 1                                                 | 1                                                    |
| Chart_55                 | Hospital_3 | F      | Aug-12            | Aug-12            | --                            | 42760                           | n.a.                                                               | n.a.                                              | n.a.                                                 |
| Chart_56                 | Hospital_3 | M      | Dec-12            | Dec-12            | 47                            | 4552                            | 1                                                                  | 1                                                 | 1                                                    |
| Chart_57                 | Hospital_3 | M      | May-13            | Jun-13            | 85                            | 43401                           | 1                                                                  | 1                                                 | 1                                                    |
| Chart_58                 | Hospital_3 | F      | Nov-13            | Nov-13            | 81                            | 45119                           | 1                                                                  | 1                                                 | 1                                                    |
| Chart_59                 | Hospital_3 | M      | May-14            | May-14            | 91                            | 43401                           | 1                                                                  | 1                                                 | 1                                                    |
| Chart_60                 | Hospital_4 | F      | Sep-12            | Oct-12            | 92                            | 44024                           | 1                                                                  | 1                                                 | 1                                                    |
| Chart_61                 | Hospital_4 | F      | Dec-12            | Dec-12            | 62                            | 43411                           | 1                                                                  | 0                                                 | 1                                                    |
| Chart_62                 | Hospital_4 | M      | Dec-12            | Dec-12            | 79                            | 43401                           | 1                                                                  | 1                                                 | 1                                                    |
| Chart_63                 | Hospital_4 | M      | Jul-13            | Aug-13            | 87                            | 42781                           | 1                                                                  | 1                                                 | 1                                                    |
| Chart_64                 | Hospital_5 | F      | May-12            | May-12            | 63                            | 4465                            | 1                                                                  | 1                                                 | 1                                                    |

| Number<br>Clinical Chart | Hospital   | Gender | Admission<br>date | Discharge<br>date | Patient's age<br>on admission | Primary<br>Diagnosis<br>(ICD-9) | Non-cases<br>group for<br>myocardial<br>infarction -<br>Validation | Non-cases group<br>for AF/flutter -<br>Validation | Non-cases group<br>for heart failure -<br>Validation |
|--------------------------|------------|--------|-------------------|-------------------|-------------------------------|---------------------------------|--------------------------------------------------------------------|---------------------------------------------------|------------------------------------------------------|
| Chart_65                 | Hospital_5 | F      | Jul-12            | Jul-12            | 81                            | 43400                           | 1                                                                  | 1                                                 | 1                                                    |
| Chart_66                 | Hospital_5 | M      | Oct-12            | Oct-12            | 76                            | 4241                            | 1                                                                  | 1                                                 | 0                                                    |
| Chart_67                 | Hospital_5 | M      | Nov-12            | Nov-12            | 55                            | 4552                            | 1                                                                  | 1                                                 | 1                                                    |
| Chart_68                 | Hospital_5 | M      | Nov-12            | Dec-12            | 68                            | 4148                            | 1                                                                  | 1                                                 | 1                                                    |
| Chart_69                 | Hospital_5 | M      | Jun-13            | Jun-13            | 68                            | 4241                            | 1                                                                  | 1                                                 | 1                                                    |
| Chart_70                 | Hospital_5 | F      | Jul-13            | Jul-13            | 80                            | 4139                            | 0                                                                  | 1                                                 | 1                                                    |
| Chart_71                 | Hospital_5 | F      | May-14            | May-14            | 78                            | 4260                            | 1                                                                  | 1                                                 | 1                                                    |
| Chart_72                 | Hospital_5 | M      | Jul-14            | Jul-14            | 87                            | 4358                            | 1                                                                  | 0                                                 | 1                                                    |
| Chart_73                 | Hospital_6 | M      | Mar-12            | Apr-12            | 76                            | 4111                            | 1                                                                  | 1                                                 | 1                                                    |
| Chart_74                 | Hospital_6 | M      | Jul-12            | Jul-12            | 84                            | 43401                           | 1                                                                  | 1                                                 | 1                                                    |
| Chart_75                 | Hospital_6 | F      | Oct-12            | Oct-12            | 75                            | 43401                           | 1                                                                  | 1                                                 | 1                                                    |
| Chart_76                 | Hospital_6 | F      | Nov-13            | Dec-13            | 87                            | 43411                           | 1                                                                  | 0                                                 | 1                                                    |
| Chart_77                 | Hospital_6 | M      | Mar-14            | Mar-14            | 68                            | 43400                           | 1                                                                  | 1                                                 | 1                                                    |
| Chart_78                 | Hospital_7 | F      | Jul-12            | Jul-12            | 90                            | 4321                            | 1                                                                  | 0                                                 | 0                                                    |
| Chart_79                 | Hospital_7 | F      | Feb-13            | Feb-13            | 47                            | 4549                            | 1                                                                  | 1                                                 | 1                                                    |
| Chart_80                 | Hospital_7 | M      | Jul-14            | Jul-14            | 39                            | 42099                           | 1                                                                  | 1                                                 | 1                                                    |

Legend: 0=no; 1=yes; 2=not reported; n.a.=clinical chart not available
